# Supplementary material for: Coxiella burnetii utilizes both glutamate and glucose during infection with glucose uptake mediated by multiple transporters
Source: PubMed Central journal article supplement — Biochem J. 2019 Oct 11;476(19):2851–67. doi: 10.1042/BCJ20190504 (PMC6792032; doi:10.1042/bcj20190504), 2019-10-11
Supplement: BCJ-476-2851-s1.pdf [file BCJ-476-2851-s1.pdf]

## Supplementary materials

**Figure S1. Complete metabolic pathway map of *C. burnetii*.** Pale blue boxes indicate metabolites. Dark green boxes indicate existing enzymes while pale green boxes indicate missing enzymes based on genome annotation data in KEGG. Purple denotes putative transporters. Metabolite abbreviations are listed in Table S1.

**Figure S2. Day 3 vs day 6 comparisons of [<sup>13</sup>C]glutamate labeled *C. burnetii*.** Metabolic pathway map of *C. burnetii* comparing <sup>13</sup>C-label incorporation at day 3 and day 6 within the same culture condition after 10 minute incubation with [<sup>13</sup>C]glutamate. Metabolites detected on the GC/MS as having incorporated <sup>13</sup>C-label are shown in larger boxes, with percentage labeling in bar graphs. Yellow bars indicate day 3 samples while orange bars indicate day 6 samples. Pale green boxes indicate missing enzymes based on genome annotation data in KEGG. Dotted arrows indicate pathways which have been abbreviated. \* =  $p < 0.05$ . NA indicates metabolites which were unable to be detected in a given condition. Metabolite abbreviations are listed in Table S1.

**Figure S3. Day 3 vs day 6 comparisons of [<sup>13</sup>C]glucose labeled *C. burnetii*.** Metabolic pathway map of *C. burnetii* comparing <sup>13</sup>C-label incorporation at day 3 and day 6 within the same culture condition after 10 minute incubation with [<sup>13</sup>C]glucose. Metabolites detected on the GC/MS as having incorporated <sup>13</sup>C label are shown in larger boxes, with percentage labeling in bar graphs. Light blue bars indicate day 3 samples while dark blue bars indicate day 6 samples. Pale green boxes indicate missing enzymes based on genome annotation data in KEGG. Dotted arrows indicate pathways which have been abbreviated. \* =  $p < 0.05$ . NA

indicates metabolites which were unable to be detected in a given condition. Metabolite abbreviations are listed in Table S1.

**Figure S4. Transposon insertion sites and confirmation of transposon mutant complementation.** Schematic of transposon insertion sites in *0265::Tn* and *0347::Tn* mutants (A). Red arrows indicate insertion sites for *cbu0265* (light blue) and *cbu0347* (yellow). Direction of internal arrows indicate direction of open reading frame. Numbers indicate base pairs within *C. burnetii* RSA 439 Phase II genome. Western blot showing expression of 3xFLAG-0265 or 3xFLAG-0347 in *C. burnetii* strains (B). RpoA used as loading control.

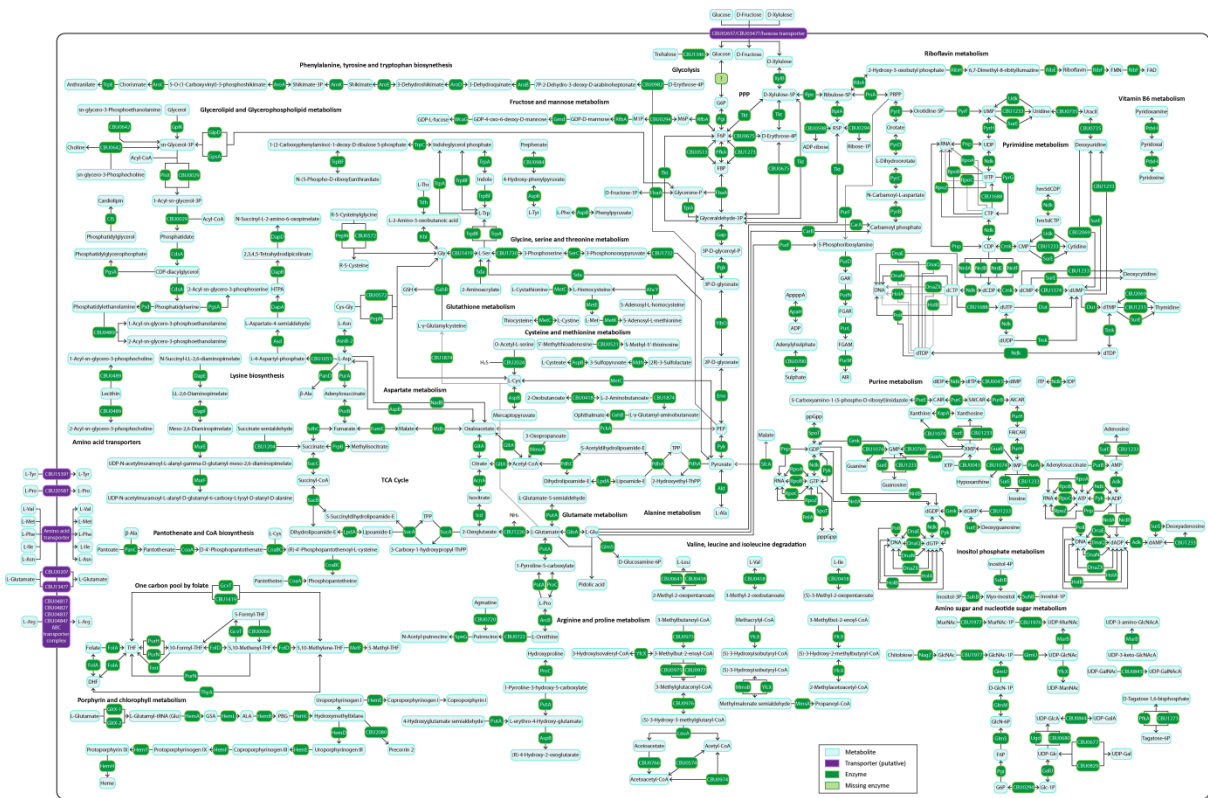

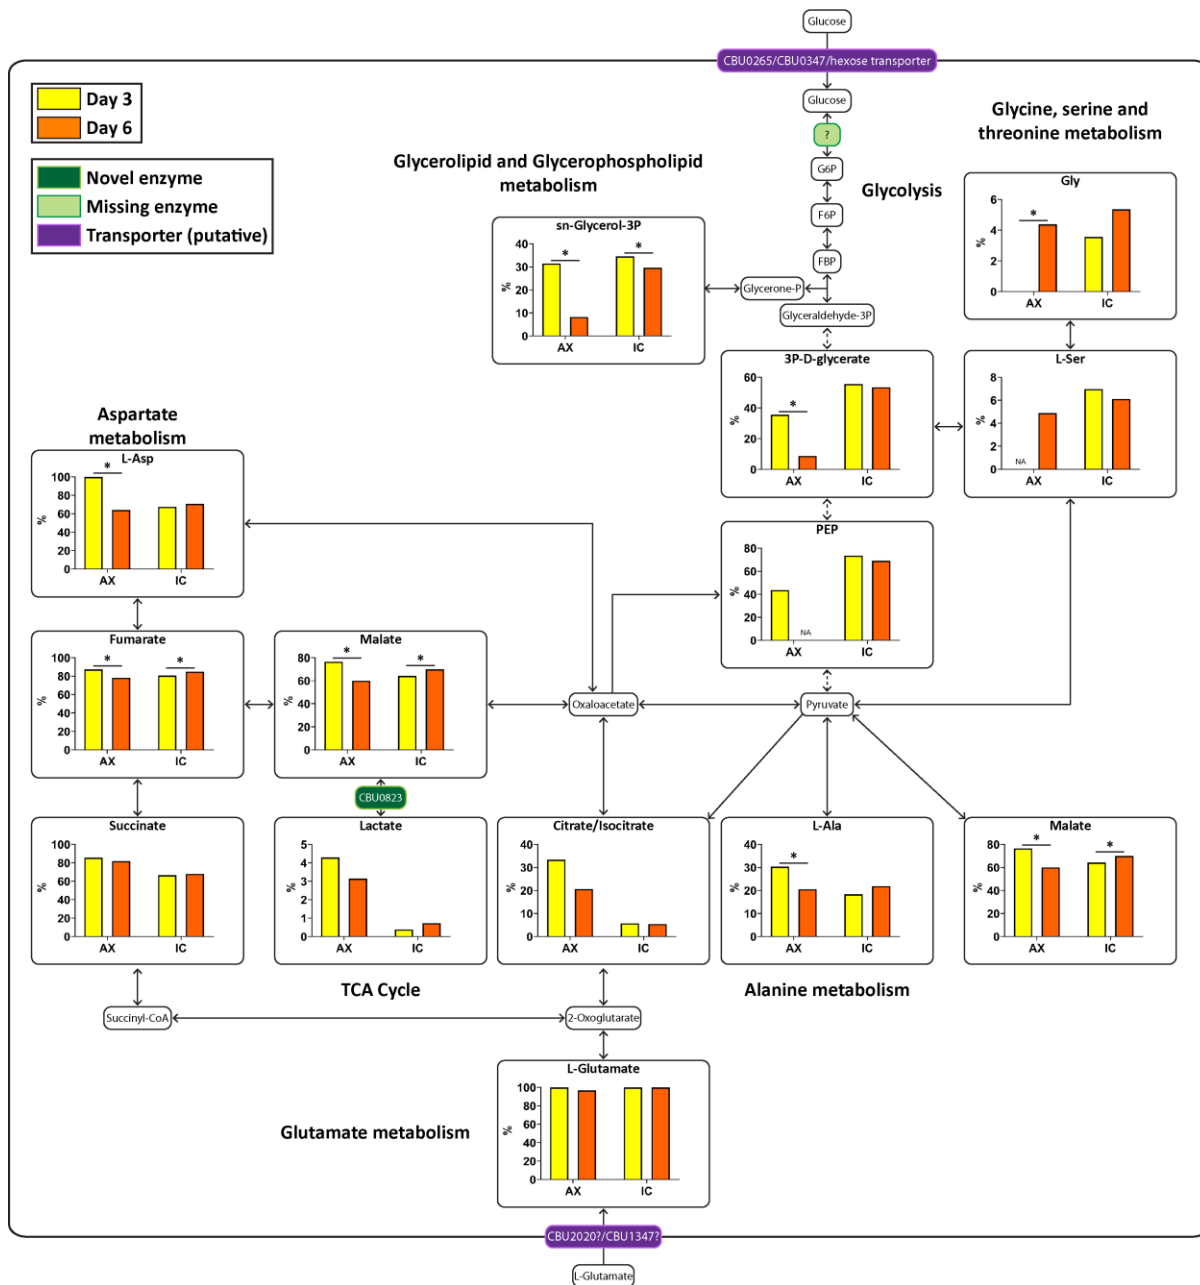

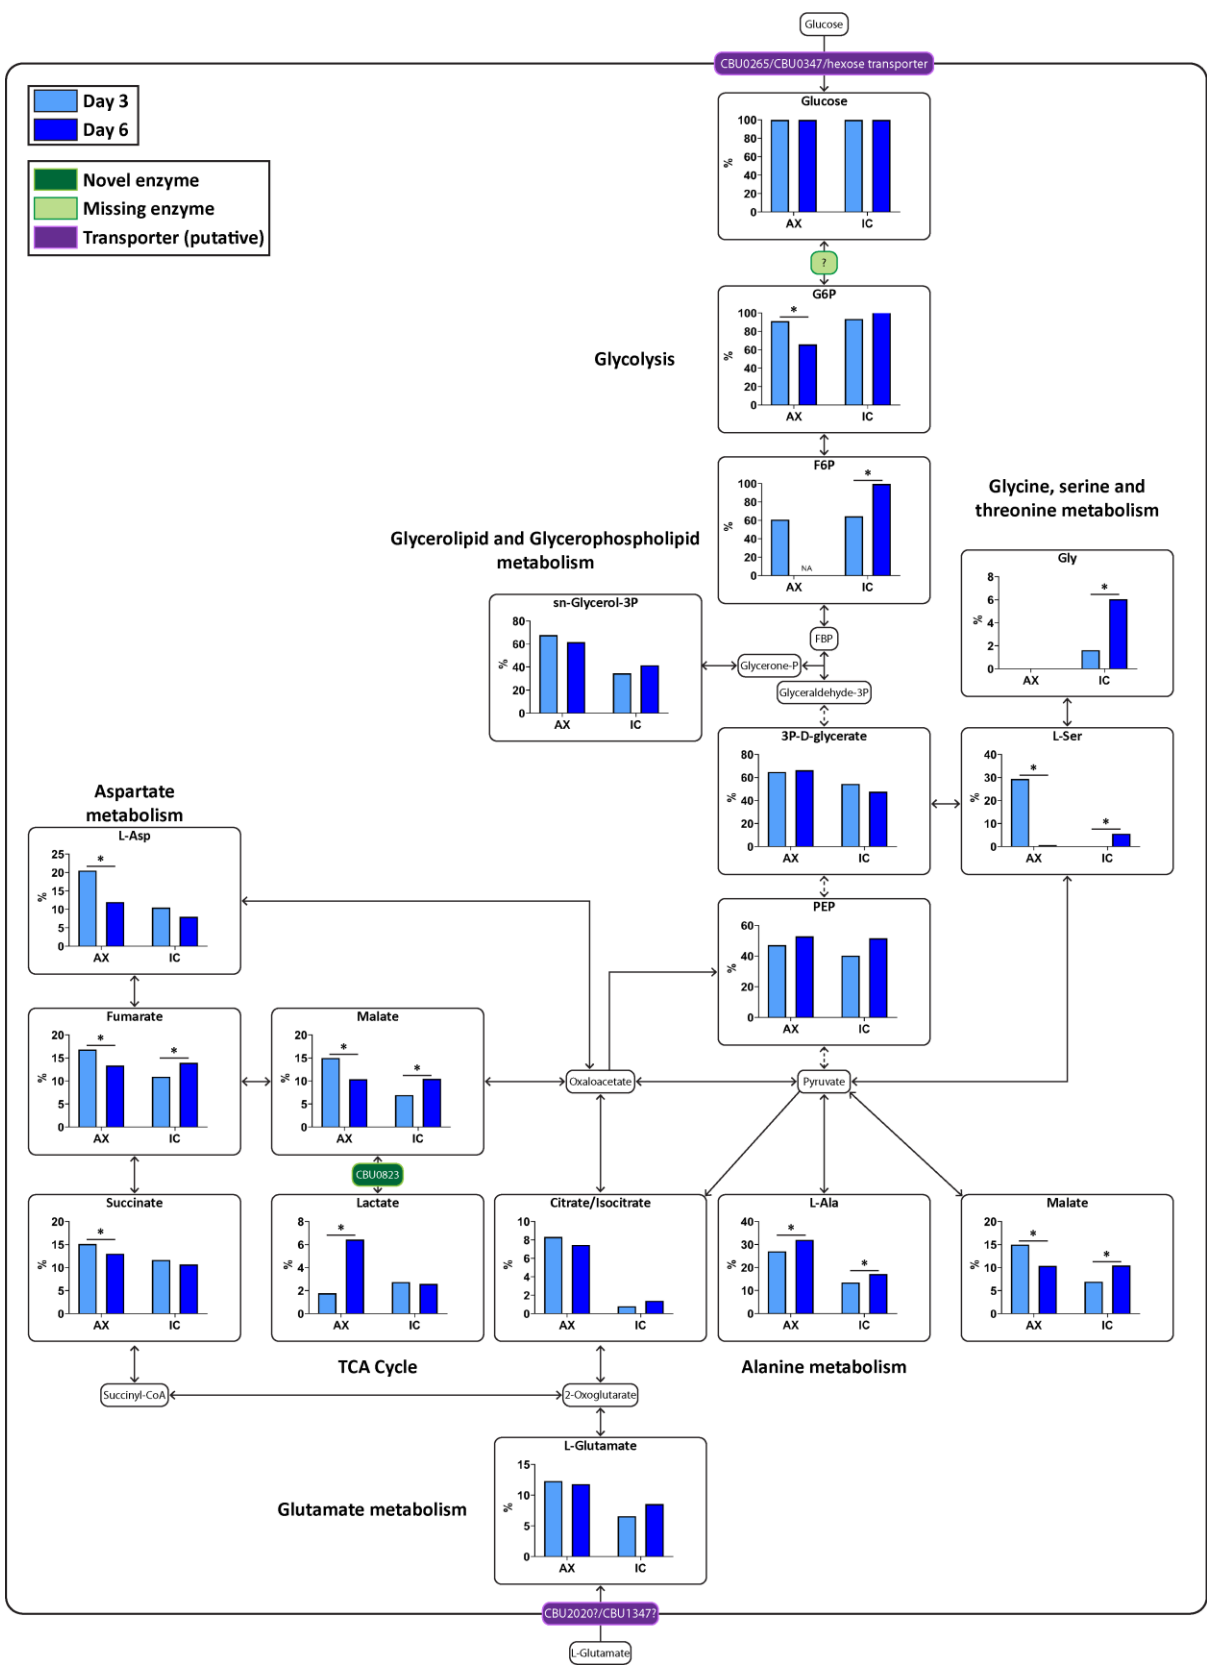

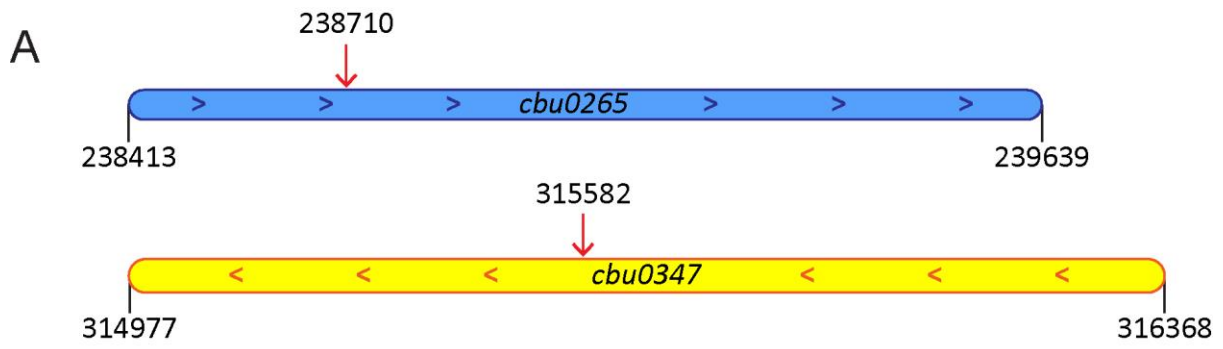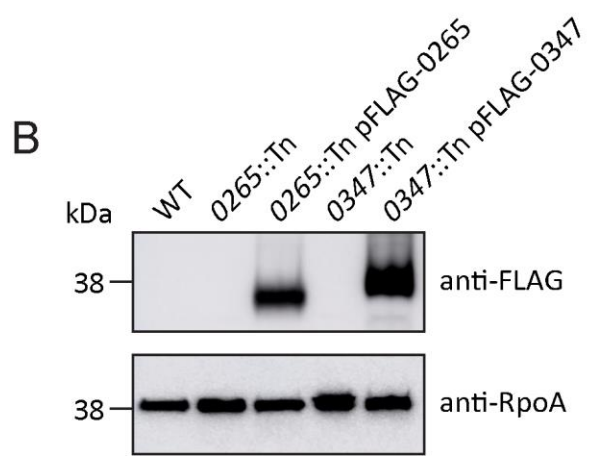

**Table S1.** Metabolite abbreviations.

| <b>Abbreviation</b> | <b>Metabolite</b>                                |
|---------------------|--------------------------------------------------|
| P                   | Phosphate                                        |
| 1P                  | 1-phosphate                                      |
| 2P                  | 2-phosphate                                      |
| 3P                  | 3-phosphate                                      |
| 4P                  | 4-phosphate                                      |
| 5P                  | 5-phosphate                                      |
| 6P                  | 6-phosphate                                      |
| G6P                 | D-Glucose 6-phosphate                            |
| F6P                 | D-Fructose 6-phosphate                           |
| FBP                 | D-Fructose 1,6-bisphosphate                      |
| PEP                 | Phosphoenolpyruvate                              |
| TPP                 | Thiamin diphosphate                              |
| ThPP                | Thiamin diphosphate                              |
| R5P                 | D-Ribose 5-phosphate                             |
| PRPP                | 5-phospho-D-ribose 1-diphosphate                 |
| M1P                 | D-Mannose 1-phosphate                            |
| M6P                 | D-Mannose 6-phosphate                            |
| UMP                 | Uridine 5'-monophosphate                         |
| UDP                 | Uridine 5'-diphosphate                           |
| UTP                 | Uridine 5'-triphosphate                          |
| CMP                 | Cytidine 5'-monophosphate                        |
| CDP                 | Cytidine 5'-diphosphate                          |
| CTP                 | Cytidine 5'-triphosphate                         |
| dCMP                | Deoxycytidine 5'-monophosphate                   |
| dCDP                | Deoxycytidine 5'-diphosphate                     |
| dCTP                | Deoxycytidine 5'-triphosphate                    |
| dUMP                | Deoxyuridine 5'-monophosphate                    |
| dUDP                | Deoxyuridine 5'-diphosphate                      |
| dUTP                | Deoxyuridine 5'-triphosphate                     |
| dTMP                | Deoxythymidine 5'-monophosphate                  |
| dTDP                | Deoxythymidine 5'-diphosphate                    |
| hm5dCDP             | 2'-Deoxy-5-hydroxymethylcytidine-5'-diphosphate  |
| hm5dCTP             | 2'-Deoxy-5-hydroxymethylcytidine-5'-triphosphate |
| GAR                 | 5'-Phosphoribosylglycinamide                     |
| FGAR                | 5'-Phosphoribosyl-N-formylglycinamide            |
| FGAM                | 5'-Phosphoribosylformylglycinamide               |
| AIR                 | Aminoimidazole ribotide                          |
| AppppA              | P1,P4-Bis(5'-adenosyl)tetrphosphate              |
| AMP                 | Adenosine 5'-monophosphate                       |
| ADP                 | Adenosine 5'-diphosphate                         |
| ATP                 | Adenosine 5'-triphosphate                        |
| IMP                 | Inosine 5'-monophosphate                         |
| IDP                 | Inosine 5'-diphosphate                           |
| ITP                 | Inosine 5'-triphosphate                          |
| XMP                 | Xanthosine 5'-monophosphate                      |
| XTP                 | Xanthosine 5'-triphosphate                       |
| GMP                 | Guanosine 5'-monophosphate                       |

|         |                                                             |
|---------|-------------------------------------------------------------|
| GDP     | Guanosine 5'-diphosphate                                    |
| GTP     | Guanosine 5'-triphosphate                                   |
| dAMP    | Deoxyadenosine 5'-monophosphate                             |
| dADP    | Deoxyadenosine 5'-diphosphate                               |
| dIMP    | Deoxyinosine 5'-monophosphate                               |
| dIDP    | Deoxyinosine 5'-diphosphate                                 |
| dITP    | Deoxyinosine 5'-triphosphate                                |
| dGMP    | Deoxyguanosine 5'-monophosphate                             |
| dGDP    | Deoxyguanosine 5'-diphosphate                               |
| dGTP    | Deoxyguanosine 5'-triphosphate                              |
| FAICAR  | 5'-Phosphoribosyl-5-formamido-4-imidazolecarboxamide        |
| AICAR   | 5'-Phosphoribosyl-5-amino-4-imidazolecarboxamide            |
| SAICAR  | 5'-Phosphoribosyl-4-(N-succinocarboxamide)-5-aminoimidazole |
| CAIR    | 1-(5-Phospho-D-ribosyl)-5-amino-4-imidazolecarboxylate      |
| ppGpp   | Guanosine 3',5'-bis(diphosphate)                            |
| pppGpp  | Guanosine 3'-diphosphate 5'-triphosphate                    |
| L-Ala   | L-Alanine                                                   |
| L-Asp   | L-Aspartate                                                 |
| L-Asn   | L-Asparagine                                                |
| L-Cys   | L-Cysteine                                                  |
| L-Glu   | L-Glutamine                                                 |
| L-Ile   | L-Isoleucine                                                |
| L-Leu   | L-Leucine                                                   |
| L-Met   | L-Methionine                                                |
| L-Phe   | L-Phenylalanine                                             |
| L-Pro   | L-Proline                                                   |
| L-Ser   | L-Serine                                                    |
| L-Thr   | L-Threonine                                                 |
| L-Trp   | L-Tryptophan                                                |
| L-Tyr   | L-Tyrosine                                                  |
| L-Val   | L-Valine                                                    |
| β-Ala   | Beta-Alanine                                                |
| HTPA    | (2S,4S)-4-Hydroxy-2,3,4,5-tetrahydrodipicolinate            |
| Gly     | Glycine                                                     |
| Cys-Gly | L-Cysteinylglycine                                          |
| GSH     | Glutathione                                                 |
| MurNAc  | N-Acetylmuramate                                            |
| GlcNAc  | N-Acetyl-D-glucosamine                                      |
| GlcNAcA | N-Acetyl-D-glucosaminuronate                                |
| GlcN    | D-Glucosamine                                               |
| Glc     | D-Glucose                                                   |
| GlcA    | D-Glucuronate                                               |
| Gal     | D-Galactose                                                 |
| GalA    | D-Galacturonate                                             |
| GalNAc  | N-Acetyl-D-galactosamine                                    |
| GalNAcA | N-Acetyl-D-galactosaminuronate                              |
| ManNAc  | N-Acetyl-D-mannosamine                                      |
| FMN     | Riboflavin-5-phosphate                                      |
| FAD     | Flavin adenine dinucleotide                                 |
| DHF     | Dihydrofolate                                               |



|     |                          |
|-----|--------------------------|
| THF | Tetrahydrofolate         |
| GSA | Glutamate-1-semialdehyde |
| ALA | 5-Aminolevulinate        |
| PBG | Porphobilinogen          |

---

**Table S2.** <sup>13</sup>C-label incorporation values in mock or uninfected THP-1 cell samples.

| <b>Metabolite</b>                | <b>Percentage label incorporation</b> |
|----------------------------------|---------------------------------------|
| <b>[<sup>13</sup>C]glutamate</b> |                                       |
| Succinate                        | 18.53%                                |
| Lactate                          | 0.92%                                 |
| <b>[<sup>13</sup>C]glucose</b>   |                                       |
| Succinate                        | 12.43%                                |
| Lactate                          | 0.53%                                 |

Metabolites not listed did not have detectable label incorporation on GC/MS
